# Supplementary material for: Headspace Solid-Phase Microextraction/Gas Chromatography–Mass Spectrometry and Chemometric Approach for the Study of Volatile Profile in X-ray Irradiated Surface-Ripened Cheeses
Source: MDPI journal article supplement (doi:10.3390/foods13030416), 2024-01-27
Supplement: s1 [file s1]

Supplementary material of article:

## Headspace Solid-Phase Microextraction/Gas Chromatography–Mass Spectrometry and Chemometric Approach for the Study of Volatile Profile in X-Ray Irradiated Surface-Ripened Cheeses

Table S1: List of VOCs identified in non-treated and X-ray-irradiated Brie samples, at three dose levels of 2.0, 4.0 and 6.0 kGy.

| Class              | VOCs                     | CAS        | MW  | m/z | RT   | LRI <sub>E</sub> | LRI <sub>R</sub> | Odor description                                                                                |
|--------------------|--------------------------|------------|-----|-----|------|------------------|------------------|-------------------------------------------------------------------------------------------------|
| Alcohols           | Ethanol                  | 64-17-5    | 46  | 45  | 8.9  | 905              | 905              | Vinous, alcoholic                                                                               |
|                    | 2-heptanol               | 543-49-7   | 116 | 45  | 23.3 | 1305             | 1304.4           | Cytrus, herbal, lemon grass                                                                     |
|                    | 1-hexanol                | 111-27-3   | 102 | 56  | 24.5 | 1311             | 1311             | Ethereal fuel oil fruity alcoholic sweet green, fruity, apple-skin and oily                     |
|                    | 1-octen-3-ol             | 3391-86-4  | 128 | 57  | 27.6 | 1410             | 1410             | Mushroom                                                                                        |
|                    | 1-heptanol               | 111-70-6   | 116 | 70  | 27.9 | 1411             | 1419             | Musty leafy violet herbal green sweet woody peony                                               |
|                    | 1-hexanol, 2-ethyl       | 104-76-7   | 130 | 57  | 28.9 | 1417             | 1441             | Solvent-like, fermented with oily nutty and fatty notes and a slight green aldehydic under note |
|                    | 2-nonanol                | 628-99-9   | 144 | 45  | 29.9 | 1504.0           | 1505             | Citrus fresh floral oily sweet                                                                  |
|                    | 7-octen-2-ol             | 39546-75-3 | 128 | 45  | 31.5 | 1514             | nd               | Waxy green orange aldehydic rose mushroom                                                       |
|                    | Phenol                   | 108-95-2   | 94  | 66  | 44.0 | 2004             | 2004             | Phenolic plastic rubber                                                                         |
| Aldehyde           | Benzaldehyde             | 100-52-7   | 106 | 106 | 30.6 | 1508             | 1508             | Strong sharp sweet bitter almond cherry                                                         |
| Alkanes            | n-hexane                 | 110-54-3   | 86  | 57  | 4.3  | ~*               | 600              | Petroleum-like                                                                                  |
|                    | n-heptane                | 142-82-5   | 100 | 43  | 4.7  | 701              | 700              | Petroleum-like                                                                                  |
|                    | n-octane                 | 111-65-9   | 114 | 43  | 5.7  | 707              | 731              | Petroleum-like                                                                                  |
|                    | n-nonane                 | 111-84-2   | 128 | 57  | 7.8  | 900              | 900              | Petroleum-like                                                                                  |
|                    | n-undecane               | 1120-21-4  | 156 | 57  | 14.4 | 1019.2           | 1100             | Petroleum-like                                                                                  |
|                    | n-dodecane               | 112-40-3   | 170 | 57  | 17.4 | 1112.9           | 1200             | Petroleum-like                                                                                  |
| Alkenes            | 1-heptene                | 592-76-7   | 98  | 56  | 5.1  | 729              | 736              | Petroleum-like                                                                                  |
|                    | 1-octene                 | 111-66-0   | 112 | 55  | 6.5  | 804              | 822              | Petroleum-like                                                                                  |
|                    | 1-decene                 | 872-05-9   | 140 | 41  | 12.6 | 1011             | 1020             | Mild odor of petroleum                                                                          |
|                    | 1-dodecene               | 112-41-4   | 168 | 55  | 18.8 | 1201             | 1231.6           | Mild odor of petroleum-like                                                                     |
| Aromatic compounds | Toluene                  | 108-88-3   | 92  | 91  | 12.9 | 1013             | 1012             | Sweet                                                                                           |
| Carboxylic acids   | Acetic acid              | 64-19-7    | 60  | 43  | 28.2 | 1413             | 1413             | Sharp pungent sour vinegar                                                                      |
|                    | Propanoic acid, 2-methyl | 79-31-2    | 88  | 43  | 31.8 | 1515             | 1520             | Acidic sour cheese dairy buttery rancid                                                         |

|               |                                          |            |     |    |      |      |           |                                                        |
|---------------|------------------------------------------|------------|-----|----|------|------|-----------|--------------------------------------------------------|
|               | n-butanoic acid                          | 107-92-6   | 88  | 60 | 33.7 | 1609 | 1609      | Sharp acetic cheese butter fruit                       |
|               | Butanoic acid, 3-methyl-                 | 503-74-2   | 102 | 60 | 34.8 | 1615 | 1621      | Sour stinky feet sweaty cheese tropical                |
|               | n-pentanoic acid                         | 109-52-4   | 102 | 60 | 36.8 | 1710 | 1711      | Sickening putrid acidic sweaty rancid                  |
|               | n-hexanoic acid                          | 142-62-1   | 130 | 60 | 39.8 | 1811 | 1812      | Sour fatty sweat cheese                                |
|               | Hexanoic acid, 2-ethyl-                  | 149-57-5   | 144 | 88 | 42.3 | 1910 | 1910      | Mild odor                                              |
|               | n-octanoic acid                          | 124-07-2   | 144 | 60 | 45.2 | 2011 | 2011      | Fatty waxy rancid oily vegetable cheesy                |
|               | n-nonanoic acid                          | 112-05-0   | 158 | 60 | 47.7 | 2111 | 2119      | Waxy dirty cheese cultured dairy                       |
|               | n-decanoic acid                          | 334-48-5   | 172 | 60 | 50.2 | 2212 | 2227      | Rancid sour fatty citrus                               |
| Esters        | Acetic acid, hexyl ester                 | 142-92-7   | 144 | 43 | 21.1 | 1215 | 1240      | Green, fruity, sweet, fatty, fresh, apple and pear     |
|               | Acetic acid, heptyl ester                | 112-06-1   | 158 | 43 | 24.8 | 1313 | 1360      | Green, waxy, fatty, citrus, aldehydic, winey and woody |
| Ketones       | 2-propanone                              | 67-64-1    | 58  | 43 | 6.1  | 802  | 802       | Solvent ethereal, apple, pear                          |
|               | 2-pentanone                              | 107-87-9   | 86  | 43 | 10.5 | 1002 | 1001      | Fingernail polish                                      |
|               | 4-heptanone                              | 123-19-3   | 114 | 71 | 15.8 | 1135 | 1135      | Fruity, cheesy, sweet, cognac, pineapple               |
|               | 2-hexanone                               | 591-78-6   | 100 | 43 | 14.2 | 1019 | 1060      | Fruity, fungal, meaty, buttery                         |
|               | 3-octanone                               | 106-68-3   | 128 | 57 | 20.6 | 1210 | 1210      | Herbal, musty, mushroom                                |
|               | 2-octanone                               | 111-13-7   | 128 | 43 | 21.9 | 1217 | 1262      | Earthy, musty                                          |
|               | 2-nonanone                               | 821-55-6   | 142 | 58 | 25.5 | 1317 | 1342      | Fresh, sweet green weedy earthy herbal                 |
|               | 8-nonen-2-one                            | 5009-32-5  | 140 | 43 | 27.6 | 1410 | 1473      | Fruity baked                                           |
|               | 2-decanone                               | 693-54-9   | 156 | 58 | 29.1 | 1418 | 1463      | Orange floral fatty peach                              |
|               | 2-undecanone                             | 112-12-9   | 170 | 58 | 32.3 | 1518 | 1564      | Waxy fruity creamy fatty orris floral                  |
| Methyl esters | Acetic acid, methyl ester                | 79-20-9    | 74  | 43 | 6.3  | 803  | 804       | Sour                                                   |
|               | Butanoic acid, methyl ester              | 623-42-7   | 102 | 43 | 10.7 | 1003 | 1001      | Fruit, apple, sweet, banana, pineapple                 |
|               | Pentanoic acid, methyl ester             | 624-24-8   | 116 | 74 | 14.4 | 1020 | 1048      | Sweat                                                  |
|               | Hexanoic acid, methyl ester              | 106-70-7   | 130 | 74 | 18.0 | 1116 | 1142      | Fruity, apricot, strawberry, pineapple                 |
|               | Heptanoic acid, methyl ester             | 106-73-0   | 144 | 74 | 21.8 | 1216 | 1241      | Fruity, sweet, waxy apple                              |
|               | Octanoic acid, methyl ester              | 111-11-5   | 158 | 74 | 25.3 | 1316 | 1352      | Fatty waxy rancid oily vegetable cheesy                |
|               | Nonanoic acid, methyl ester              | 1731-84-6  | 172 | 74 | 29.0 | 1418 | 1476      | Sweet fruity pear waxy tropical wine                   |
|               | Decanoic acid, methyl ester              | 110-42-9   | 186 | 74 | 32.0 | 1517 | 1550      | Oily wine fruity floral                                |
|               | Undecanoic acid, methyl ester            | 1731-86-8  | 200 | 74 | 35.4 | 1700 | 1699      | Fatty waxy fruity                                      |
|               | Dodecanoic acid, methyl ester            | 111-82-0   | 214 | 74 | 38.4 | 1802 | 1801      | Waxy soapy creamy coconut mushroom                     |
|               | Tridecanoic, 12-methyl-,<br>methyl ester | 5129-58-8  | 242 | 74 | 42.6 | 1912 | _*<br>_** | _*<br>_***                                             |
|               | Tetradecanoic acid, methyl<br>ester      | 24-10-7    | 242 | 74 | 43.9 | 2002 | 2001      | Fatty waxy petal                                       |
|               | Myristoleic acid, methyl ester           | 56219-06-8 | 240 | 55 | 44.6 | 2008 | 2000      | Fatty waxy petal                                       |

|                             |                                           |           |     |     |      |      |      |                                                            |
|-----------------------------|-------------------------------------------|-----------|-----|-----|------|------|------|------------------------------------------------------------|
|                             | Tetradecanoic, 12-methyl-, methyl ester   | 5129-66-8 | 256 | 74  | 45.5 | 2013 | -**  | -***                                                       |
|                             | Pentadecanoic acid, methyl ester          | 7132-64-1 | 256 | 74  | 46.3 | 2103 | 2102 | Waxy, soapy, creamy, coconut, with mushroom nuances        |
|                             | Hexadecanoic acid, methyl ester           | 112-39-0  | 270 | 74  | 48.8 | 2204 | 2204 | Oily waxy fatty orris                                      |
| Other compounds             | 2,4,7,9-tetramethyl-5-decyne-4,7-diol (+) | 126-86-3  | 226 | 109 | 45.6 | 2014 | -**  | Odorless                                                   |
|                             | 2,4,7,9-tetramethyl-5-decyne-4,7-diol (-) | 126-86-3  | 226 | 109 | 45.8 | 2015 | -**  | Odorless                                                   |
| Sulfur-containing compounds | Dimethyl sulfone                          | 67-71-0   | 94  | 79  | 41.5 | 1905 | 1906 | Sulfurous burnt                                            |
| Terpene                     | D-Limonene                                | 5989-27-5 | 136 | 68  | 17.9 | 1115 | -**  | Citric, lively, nuances of tangerine, celery and lemon oil |

MW: molecular weight; m/z: fragment ion with the higher relative intensity; RT: retention time; LRI<sub>E</sub>: experimental values of linear retention index; LRI<sub>R</sub>: reference values of linear retention index; -\* not included in the RTs range of the C7-C30 standard solution; -\*\*not available on PubChem (<https://pubchem.ncbi.nlm.nih.gov>) -\*\*\* not available on PubChem (<https://pubchem.ncbi.nlm.nih.gov>) and on The Good Scents Company Information System (<http://www.thegoodscentscompany.com/search2.html>).

Table S2: List of VOCs identified in non-treated and X-ray-irradiated Camembert samples, at three dose levels of 2.0, 4.0 and 6.0 kGy.

| Class     | VOCs                | CAS        | PM  | m/z | RT   | LRI <sub>E</sub> | LRI <sub>R</sub> | Odor                                                                                            |
|-----------|---------------------|------------|-----|-----|------|------------------|------------------|-------------------------------------------------------------------------------------------------|
| Alcohols  | Ethanol             | 64-17-5    | 46  | 45  | 8.9  | 905              | 905              | Vinous, alcoholic                                                                               |
|           | 2-butanol, 3-methyl | 598-75-4   | 88  | 45  | 16.1 | 1106             | 1108             | Musty, alcoholic, with nuances of vegetables                                                    |
|           | 1-butanol, 3-methyl | 123-51-3   | 88  | 55  | 19.6 | 1205             | 1204             | Alcoholic, fruity, cognac, molasses                                                             |
|           | 2-heptanol          | 543-49-7   | 116 | 45  | 23.3 | 1305             | 1304.4           | Cytrus, herbal, lemon grass                                                                     |
|           | 1-hexanol           | 111-27-3   | 102 | 56  | 24.5 | 1311             | 1311             | Ethereal fuel oil fruity alcoholic sweet green, fruity, apple-skin and oily                     |
|           | 1-heptanol          | 111-70-6   | 116 | 70  | 27.9 | 1411             | 1419             | Musty leafy violet herbal green sweet woody peony                                               |
|           | 1-hexanol, 2-ethyl  | 104-76-7   | 130 | 57  | 28.9 | 1417             | 1441             | Solvent-like, fermented with oily nutty and fatty notes and a slight green aldehydic under note |
|           | 2-nonanol           | 628-99-9   | 144 | 45  | 29.9 | 1504.0           | 1505             | Citrus fresh floral oily sweet                                                                  |
|           | 1-octanol           | 111-87-5   | 130 | 56  | 31.0 | 1511             | 1510             | Waxy green creamy citrus orange cheese fruity                                                   |
|           | 7-octen-2-ol        | 39546-75-3 | 128 | 45  | 31.5 | 1514             | nd               | Waxy green orange aldehydic rose mushroom                                                       |
|           | Phenylethyl Alcohol | 60-12-8    | 122 | 91  | 41.6 | 1905             | 1905             | Floral rose dried rose flower rose water                                                        |
| Aldehydes | Phenol              | 108-95-2   | 94  | 66  | 44.0 | 2004             | 2004             | Phenolic plastic rubber                                                                         |
|           | n-octanal           | 124-13-0   | 128 | 43  | 21.6 | 1215             | 1247             | Aldehydic, fat, soap, lemon                                                                     |

|                    |                          |           |     |     |      |        |        |                                                |
|--------------------|--------------------------|-----------|-----|-----|------|--------|--------|------------------------------------------------|
|                    | n-decanal                | 112-31-2  | 156 | 43  | 28.9 | 1417   | 1448   | Sweet aldehydic waxy orange peel citrus floral |
|                    | Benzaldehyde             | 100-52-7  | 106 | 106 | 30.6 | 1508   | 1508   | Strong sharp sweet bitter almond cherry        |
|                    | Phenylacetaldehyde       | 122-78-1  | 120 | 91  | 34.9 | 1616   | 1616   | Green sweet floral hyacinth clover honey cocoa |
| Alkanes            | n-heptane                | 142-82-5  | 100 | 43  | 4.7  | 701    | 700    | Petroleum-like                                 |
|                    | n-octane                 | 111-65-9  | 114 | 43  | 5.7  | 707    | 731    | Petroleum-like                                 |
|                    | n-nonane                 | 111-84-2  | 128 | 57  | 7.8  | 900    | 900    | Petroleum-like                                 |
|                    | n-undecane               | 1120-21-4 | 156 | 57  | 14.4 | 1019.2 | 1100   | Petroleum-like                                 |
|                    | n-dodecane               | 112-40-3  | 170 | 57  | 17.4 | 1112.9 | 1200   | Petroleum-like                                 |
|                    | n-tridecane              | 629-50-5  | 184 | 57  | 21.4 | 1213.9 | 1300   | Petroleum-like                                 |
|                    | n-pentadecane            | 629-62-9  | 212 | 57  | 28.8 | 1416.5 | 1500   | Petroleum-like                                 |
| Alkenes            | 1-octene                 | 111-66-0  | 112 | 55  | 6.5  | 804    | 822    | Petroleum-like                                 |
|                    | 1-decene                 | 872-05-9  | 140 | 41  | 12.6 | 1011   | 1020   | Mild odor of petroleum                         |
|                    | 1-undecene               | 821-95-4  | 154 | 55  | 15.8 | 1105   | 1135   | Mild odor of petroleum-like                    |
|                    | 1-dodecene               | 112-41-4  | 168 | 55  | 18.8 | 1201   | 1231.6 | Mild odor of petroleum-like                    |
| Alkynes            | Acetonitrile             | 75-05-8   | 41  | 41  | 11.6 | 1007   | 1006.4 | Aromatic, ethereal                             |
| Aromatic compounds | Toluene                  | 108-88-3  | 92  | 91  | 12.9 | 1013   | 1012   | Sweet                                          |
|                    | Styrene                  | 100-42-5  | 104 | 104 | 20.8 | 1211   | 1228.7 | Balsamic, almond                               |
| Carboxylic acids   | Acetic acid              | 64-19-7   | 60  | 43  | 28.2 | 1413   | 1413   | Sharp pungent sour vinegar                     |
|                    | Propanoic acid           | 79-09-4   | 74  | 74  | 30.9 | 1510   | 1510   | Pungent acidic cheesy vinegar                  |
|                    | Propanoic acid, 2-methyl | 79-31-2   | 88  | 43  | 31.8 | 1515   | 1520   | Acidic sour cheese dairy buttery rancid        |
|                    | Butanoic acid            | 107-92-6  | 88  | 60  | 33.7 | 1609   | 1609   | Sharp acetic cheese butter fruit               |
|                    | Butanoic acid, 3-methyl- | 503-74-2  | 102 | 60  | 34.8 | 1615   | 1621   | Sour stinky feet sweaty cheese tropical        |
|                    | Pentanoic acid           | 109-52-4  | 102 | 60  | 36.8 | 1710   | 1711   | Sickening putrid acidic sweaty rancid          |
|                    | Hexanoic acid            | 142-62-1  | 130 | 60  | 39.8 | 1811   | 1812   | Sour fatty sweat cheese                        |
|                    | Heptanoic acid           | 111-14-8  | 130 | 60  | 42.5 | 1911   | 1913   | Rancid sour cheesy sweat                       |
|                    | Octanoic acid            | 124-07-2  | 144 | 60  | 45.2 | 2011   | 2011   | Fatty waxy rancid oily vegetable cheesy        |
|                    | Nonanoic acid            | 112-05-0  | 158 | 60  | 47.7 | 2111   | 2119   | Waxy dirty cheese cultured dairy               |
|                    | n-Decanoic acid          | 334-48-5  | 172 | 60  | 50.2 | 2212   | 2227   | Rancid sour fatty citrus                       |
| Ketones            | 2-pentanone              | 107-87-9  | 86  | 43  | 10.5 | 1002   | 1001   | Fingernail polish                              |
|                    | 3-octanone               | 106-68-3  | 128 | 57  | 20.6 | 1210   | 1210   | Herbal, musty, mushroom                        |
|                    | 2-octanone               | 111-13-7  | 128 | 43  | 21.9 | 1217   | 1262   | Earthy, musty                                  |

|               |                                  |            |     |     |       |      |      |                                                      |
|---------------|----------------------------------|------------|-----|-----|-------|------|------|------------------------------------------------------|
|               | 2-nonanone                       | 821-55-6   | 142 | 58  | 25.5  | 1317 | 1342 | Fresh, sweet green weedy earthy herbal               |
|               | 8-nonen-2-one                    | 5009-32-5  | 140 | 43  | 27.6  | 1410 | 1473 | fruity baked                                         |
|               | 2-decanone                       | 693-54-9   | 156 | 58  | 29.1  | 1418 | 1463 | Orange floral fatty peach                            |
|               | 2-undecanone                     | 112-12-9   | 170 | 58  | 32.3  | 1518 | 1564 | Waxy fruity creamy fatty orris floral                |
|               | Acetophenone                     | 98-86-2    | 120 | 105 | 34.5  | 1613 | 1615 | Sweet pungent hawthorn mimosa almond acacia chemical |
|               | 2-tridecanone                    | 593-08-8   | 198 | 58  | 38.65 | 1803 | 1803 | Fatty waxy dairy milky coconut nutty herbal earthy   |
| Methyl esters | Acetic acid, methyl ester        | 79-20-9    | 74  | 43  | 6.3   | 803  | 804  | Sour                                                 |
|               | Butanoic acid, methyl ester      | 623-42-7   | 102 | 43  | 10.7  | 1003 | 1001 | Fruit, apple,sweet, banana, pineapple                |
|               | Pentanoic acid, methyl ester     | 624-24-8   | 116 | 74  | 14.4  | 1020 | 1048 | Sweat                                                |
|               | Hexanoic acid, methyl ester      | 106-70-7   | 130 | 74  | 18.0  | 1116 | 1142 | Fruity, apricot, strawberry, pineapple               |
|               | Heptanoic acid, methyl ester     | 106-73-0   | 144 | 74  | 21.8  | 1216 | 1241 | Fruity, sweet, waxy apple                            |
|               | Octanoic acid, methyl ester      | 111-11-5   | 158 | 74  | 25.3  | 1316 | 1352 | Fatty waxy rancid oily vegetable cheesy              |
|               | Nonanoic acid, methyl ester      | 1731-84-6  | 172 | 74  | 29.0  | 1418 | 1476 | Sweet fruity pear waxy tropical wine                 |
|               | Decanoic acid, methyl ester      | 110-42-9   | 186 | 74  | 32.0  | 1517 | 1550 | Oily wine fruity floral                              |
|               | 4-decenoic acid, methyl ester    | 93979-14-7 | 184 | 74  | 34.0  | 1610 | 1611 | Fruity, pear, mango, fishy, peach, skin green        |
|               | Undecanoic acid, methyl ester    | 1731-86-8  | 200 | 74  | 35.4  | 1700 | 1699 | Fatty waxy fruity                                    |
|               | Dodecanoic acid, methyl ester    | 111-82-0   | 214 | 74  | 38.4  | 1802 | 1801 | Waxy soapy creamy coconut mushroom                   |
|               | Tetradecanoic acid, methyl ester | 124-10-7   | 242 | 74  | 43.9  | 2002 | 2001 | Fatty waxy petal                                     |
|               | Myristoleic acid, methyl ester   | 56219-06-8 | 240 | 55  | 44.6  | 2008 | 2000 | Fatty waxy petal                                     |
|               | Pentadecanoic acid, methyl ester | 7132-64-1  | 256 | 74  | 46.3  | 2103 | 2102 | Waxy, soapy, creamy, coconut, with mushroom nuances  |

|                             |                                           |            |     |     |      |      |      |                                                    |
|-----------------------------|-------------------------------------------|------------|-----|-----|------|------|------|----------------------------------------------------|
|                             | Hexadecanoic acid, methyl ester           | 112-39-0   | 270 | 74  | 48.8 | 2204 | 2204 | Oily waxy fatty orris                              |
|                             | 9-Hexadecenoic acid, methyl ester         | 10030-74-7 | 268 | 55  | 49.4 | 2207 | 2236 | -***                                               |
| Other compounds             | 2,4,7,9-tetramethyl-5-decyne-4,7-diol (+) | 126-86-3   | 226 | 109 | 45.6 | 2014 | -**  | Odorless                                           |
|                             | 2,4,7,9-tetramethyl-5-decyne-4,7-diol (-) | 126-86-3   | 226 | 109 | 45.8 | 2015 | -**  | Odorless                                           |
|                             | Trichloromethane                          | 67-66-3    | 118 | 83  | 12.1 | 1009 | 1010 | Sweet                                              |
|                             | Oxime-, methoxy-phenyl-                   | 67160-14-9 | 151 | 133 | 37.0 | 1711 | 1710 | Balsamic                                           |
| Lactones                    | Dehydromevalonic lactone                  | 2381-87-5  | 112 | 82  | 44.8 | 2009 | 1978 | Sweet caramel-like                                 |
|                             | δ-Decalactone                             | 705-86-2   | 170 | 99  | 48.7 | 2203 | 2203 | Fresh sweet oily coconut fruity peach creamy dairy |
| Sulfur-containing compounds | Methanethiol                              | 74-93-1    | 48  | 47  | 4.6  | 700  | 700  | Sulfur, gasoline, garlic                           |
|                             | Ethanethiol                               | 75-08-1    | 62  | 62  | 5.2  | 704  | 731  | Thiamin                                            |
|                             | Methyl thioacetate                        | 1534-08-3  | 90  | 43  | 13.2 | 1014 | 1041 | Sulfurous eggy cheese dairy vegetable cabbage      |
|                             | Disulfide, dimethyl                       | 624-92-0   | 94  | 94  | 14.2 | 1019 | 1036 | Garlic                                             |
|                             | 2,4-dithiapentane                         | 1618-26-4  | 108 | 61  | 22.2 | 1218 | 1256 | Sulfurous, metallic, spicy                         |
|                             | Hexanethioic acid, S-propyl ester         | 2432-78-2  | 174 | 99  | 26.6 | 1404 | 1303 | Odorless                                           |
|                             | Dimethyl sulfone                          | 67-71-0    | 94  | 79  | 41.5 | 1905 | 1906 | Sulfurous burnt                                    |

MW: molecular weight; m/z: fragment ion with the higher relative intensity; RT: retention time; LRI<sub>E</sub>: experimental values of linear retention index; LRI<sub>R</sub>: reference values of linear retention index; -\* not included in the RTs range of the C7-C30 standard solution; -\*\*not available on PubChem (<https://pubchem.ncbi.nlm.nih.gov>) -\*\*\* not available on PubChem (<https://pubchem.ncbi.nlm.nih.gov>) and on The Good Scents Company Information System (<http://www.thegoodscentscompany.com/search2.html>).
